# Supplementary material for: Chlamyphilone, a Novel Pochonia chlamydosporia Metabolite with Insecticidal Activity
Source: PubMed Central journal article supplement (PMC6412625; doi:10.3390/molecules24040750), 2019-02-19
Supplement: molecules-24-00750-s001.pdf [file molecules-24-00750-s001.pdf]

# SUPPLEMENTARY MATERIALS

## Chlamyphilone, a Novel *Pochonia chlamydosporia* Metabolite with Insecticidal Activity

Federica Lacatena <sup>1,†</sup>, Roberta Marra <sup>1,†</sup>, Pierluigi Mazzei <sup>2,3</sup>, Alessandro Piccolo <sup>1,3</sup>, Maria Cristina Digilio <sup>1</sup>, Massimo Giorgini <sup>4</sup>, Sheridan L. Woo <sup>4,5</sup>, Pierpaolo Cavallo <sup>6,7</sup>, Matteo Lorito <sup>1,4</sup> and Francesco Vinale <sup>1,4,\*</sup>

<sup>1</sup> Dipartimento di Agraria, Università degli Studi di Napoli Federico II, 80055 Portici (NA), Italy; federica.lacatena@unina.it (F.L.); robmarra@unina.it (R.M.); alessandro.piccolo@unina.it (A.P.); digilio@unina.it (M.C.D.); lorito@unina.it (M.L.)

<sup>2</sup> Dipartimento di Farmacia (DIFARMA), Università degli Studi di Salerno, 84084 Fisciano (SA), Italy; pmazzei@unisa.it

<sup>3</sup> Centro Interdipartimentale di Ricerca sulla Spettroscopia di Risonanza Magnetica Nucleare, per l'Ambiente, l'Agro-Alimentare ed i Nuovi Materiali (CERMANU), Università degli Studi di Napoli Federico II, 80055 Portici (NA), Italy

<sup>4</sup> Istituto per la Protezione Sostenibile delle Piante, Consiglio Nazionale delle Ricerche (IPSP-CNR), 80055 Portici (NA), Italy; massimo.giorgini@ipsp.cnr.it

<sup>5</sup> Dipartimento di Farmacia, Università degli Studi di Napoli Federico II, 80131 Napoli, Italy; woo@unina.it

<sup>6</sup> Dipartimento di Fisica "E.R. Caianiello", Università degli Studi di Salerno, 84084 Fisciano (SA), Italy; pcavallo@unisa.it

<sup>7</sup> Istituto Sistemi Complessi, Consiglio Nazionale delle Ricerche (ISC-CNR), Rome, Italy;

\* Correspondence: francesco.vinale@ipsp.cnr.it; Tel.: +39-081-253-9338

† These authors contributed equally to this work.

Figures S1–S11 and S13–S14: NMR and MS spectra of compounds. Figure S12: Conformational model of the new compound named chlamyphilone. Table S1: Biological activity of the isolated compounds.

## Contents

**Figure S1.** Mass spectrum of acetyl chlamyphilone;  $m/z$  263.1409,63 =  $[M+H]^+$ .

**Figure S2.** Mass spectrum of fraction 3 obtained from *P. lilacinus* corresponding to a mixture of Leucinostatins (A, B e D);  $m/z$  1219,63 =  $[M+H]^+$ ;  $m/z$  1241,63 =  $[M+Na]^+$ ;  $m/z$  1201,63 =  $[M+H-H_2O]^+$  (Leucinostatin A);  $m/z$  1205,60 =  $[M+H]^+$ ;  $m/z$  1227,6 =  $[M+Na]^+$ ;  $m/z$  1187,6 =  $[M+H-H_2O]^+$  (Leucinostatin B);  $m/z$  1105,47 =  $[M+H]^+$ ;  $m/z$  1127,47 =  $[M+Na]^+$ ;  $m/z$  1087,47 =  $[M+H-H_2O]^+$  (Leucinostatin D).

**Figure S3.** Mass spectrum of fraction 7 obtained from organic extracts of *P. griseofulvum*  $m/z$  335,1234 =  $[M+H-H_2O]^+$ ;  $m/z$  353,0793 =  $[M+H]^+$ ;  $m/z$  375,0793 =  $[M+Na]^+$ ;  $m/z$  727,1318 =  $[M_2+Na]^+$ .

**Figure S4.** Mass (A) and fragmentation spectra (B) of chlamyphilone.

**Figure S5.**  $^1H$  NMR of chlamyphilone.

**Figure S6.**  $^{13}C$  NMR of chlamyphilone.

**Figure S7.** DEPT 135 of chlamyphilone.

**Figure S8.**  $^1H$ - $^1H$  COSY of chlamyphilone.

**Figure S9.**  $^1H$ - $^{13}C$  HSQC of chlamyphilone.

**Figure S10.**  $^1H$ - $^{13}C$  HMBC of chlamyphilone.

**Figure S11.** NOESY of chlamyphilone.

**Figure S12.** Conformational model of chlamyphilone.

**Figure S13.** Mass spectrum of fraction 3 from *B. bassiana* corresponding to beauvericin;  $m/z$  784,96 =  $[M+H]^+$ ;  $m/z$  766,96 =  $[M+H-H_2O]^+$ ;  $m/z$  806,96 =  $[M+Na]^+$ ;  $m/z$  1590,92 =  $[M_2+Na]^+$ .

**Figure S14.** Mass spectrum of Destruxin B2;  $m/z$  579,2926 =  $[M+H]^+$ ;  $m/z$  561,3420 =  $[M+H-H_2O]^+$ ;  $m/z$  617,2034 =  $[M+K]^+$ .

**Table S1.** Biological activity of the isolated compounds.

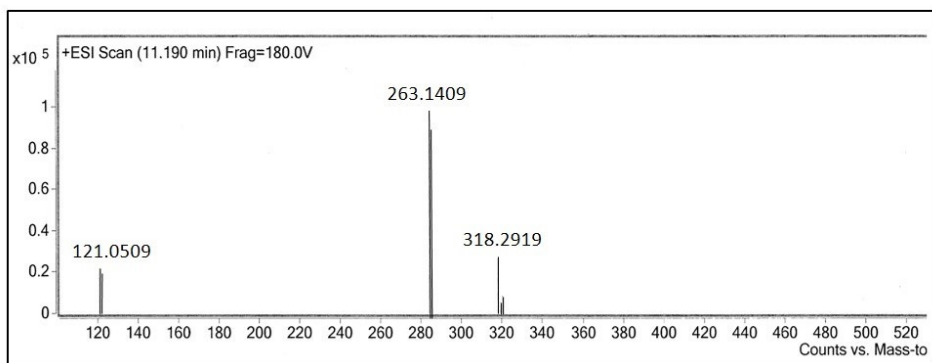

**Figure S1.** Mass spectrum of acetyl chlamyphilone;  $m/z$  263.1409,63 =  $[M+H]^+$ .

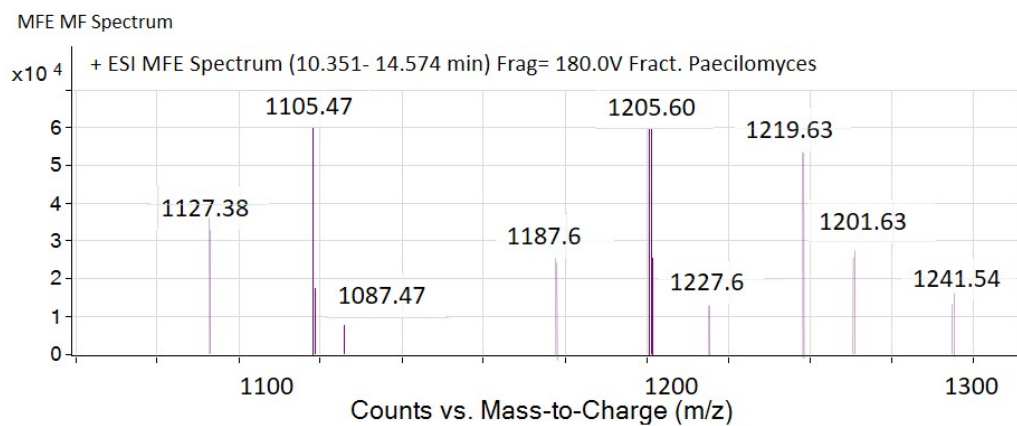

**Figure S2.** Mass spectrum of fraction 3 obtained from *P. lilacinus* corresponding to a mixture of Leucinostatins (A, B e D); m/z 1219,63 = [M+H]<sup>+</sup>; m/z 1241,63 = [M+Na]<sup>+</sup>; m/z 1201,63 = [M+ H-H<sub>2</sub>O]<sup>+</sup> (Leucinostatin A); m/z 1205,60 = [M+H]<sup>+</sup>; m/z 1227,6 = [M+Na]<sup>+</sup>; m/z 1187,6 = [M+ H-H<sub>2</sub>O]<sup>+</sup> (Leucinostatin B); m/z 1105,47 = [M+H]<sup>+</sup>; m/z 1127,47 = [M+Na]<sup>+</sup>; m/z 1087,47 = [M+ H-H<sub>2</sub>O]<sup>+</sup> (Leucinostatin D).

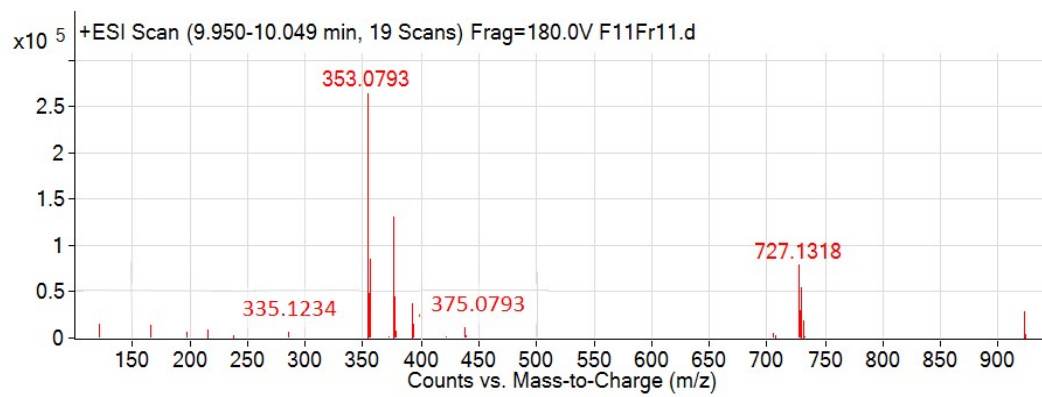

**Figure S3.** Mass spectrum of fraction 7 obtained from organic extracts of *P. griseofulvum*  $m/z$  335,1234 =  $[M + H - H_2O]^+$ ;  $m/z$  353,0793 =  $[M+H]^+$ ;  $m/z$  375,0793 =  $[M + Na]^+$ ;  $m/z$  727,1318 =  $[M_2 + Na]^+$ .

(A)

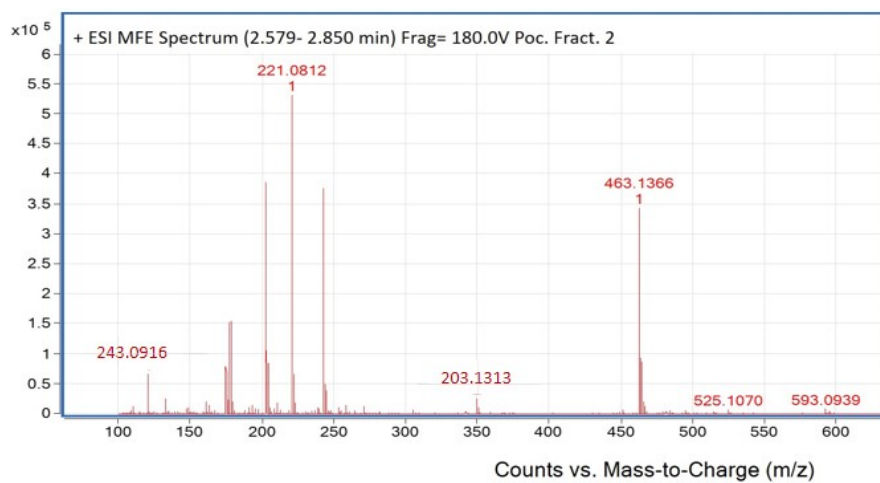

(B)

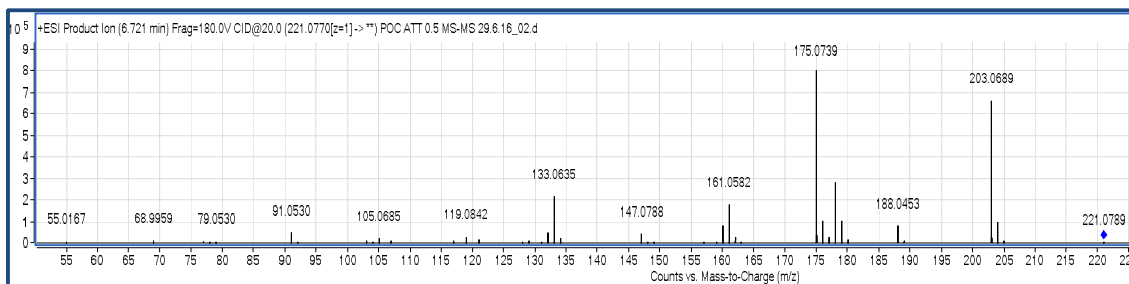

**Figure S4.** Mass (A) and fragmentation spectra (B) of chlamyphilone.

188 = 203.1313 [M+H-H<sub>2</sub>O]<sup>+</sup> - -CH<sub>3</sub>

175 = 203.1313 [M+H-H<sub>2</sub>O]<sup>+</sup> - -CH<sub>3</sub> - CH

161 = 203.1313 [M+H-H<sub>2</sub>O]<sup>+</sup> - -CH<sub>3</sub> - CH - CH<sub>2</sub>

147 = 203.1313 [M+H-H<sub>2</sub>O]<sup>+</sup> - -CH<sub>3</sub> - CH - CH<sub>2</sub> - CH<sub>2</sub>

133 = 203.1313 [M+H-H<sub>2</sub>O]<sup>+</sup> - -CH<sub>3</sub> - CH - CH<sub>2</sub> - CH<sub>2</sub> - CH<sub>2</sub>

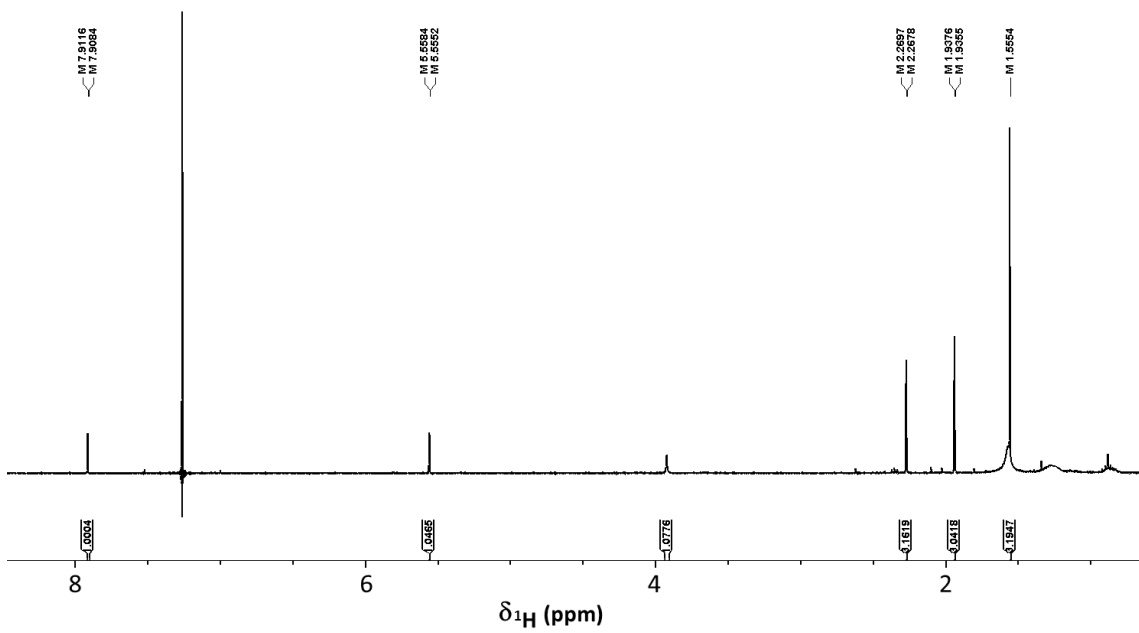

Figure S5.  $^1\text{H}$  NMR of chlamyphilone.

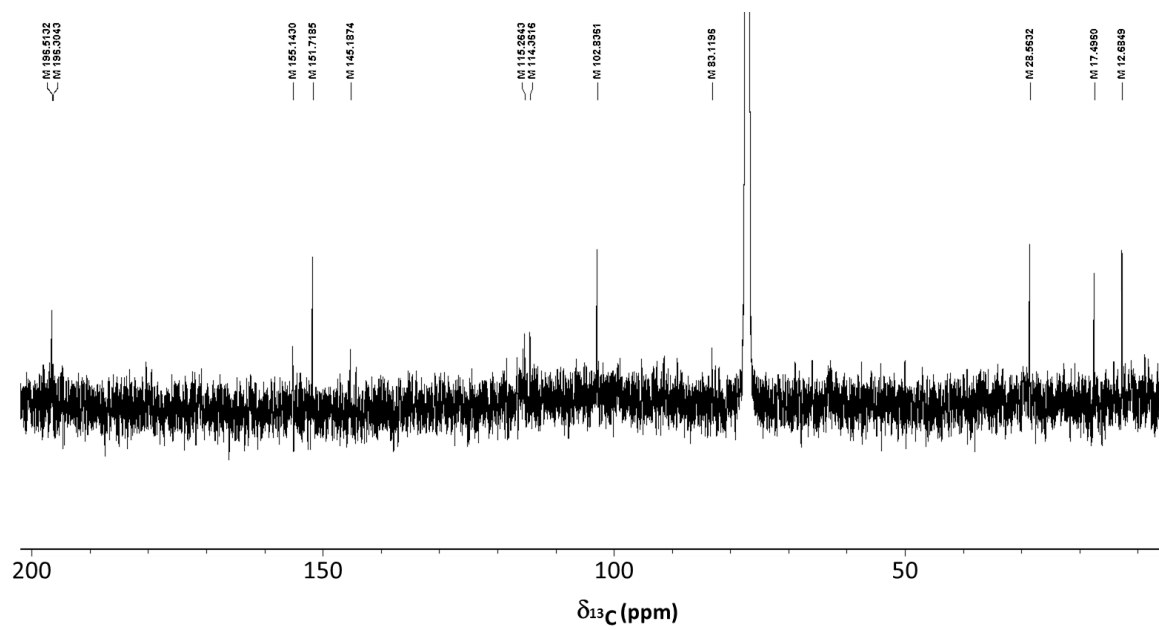

Figure S6.  $^{13}\text{C}$  NMR of chlamyphilone.



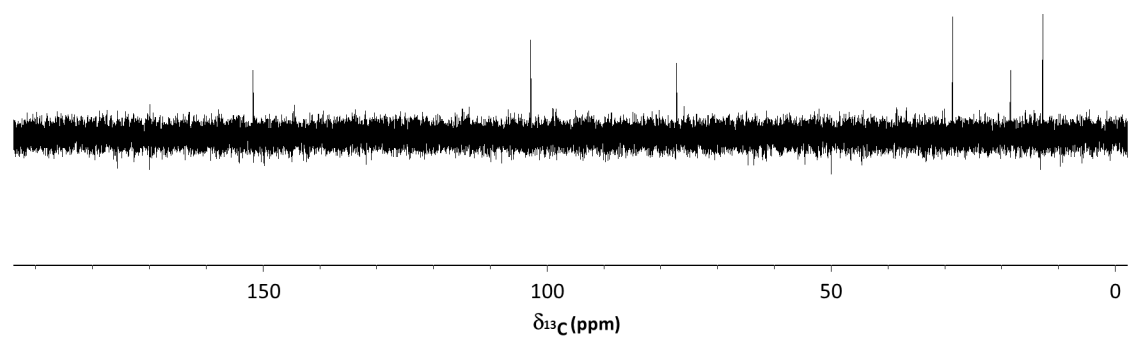

**Figure S7.** DEPT 135 of chlamyphilone.

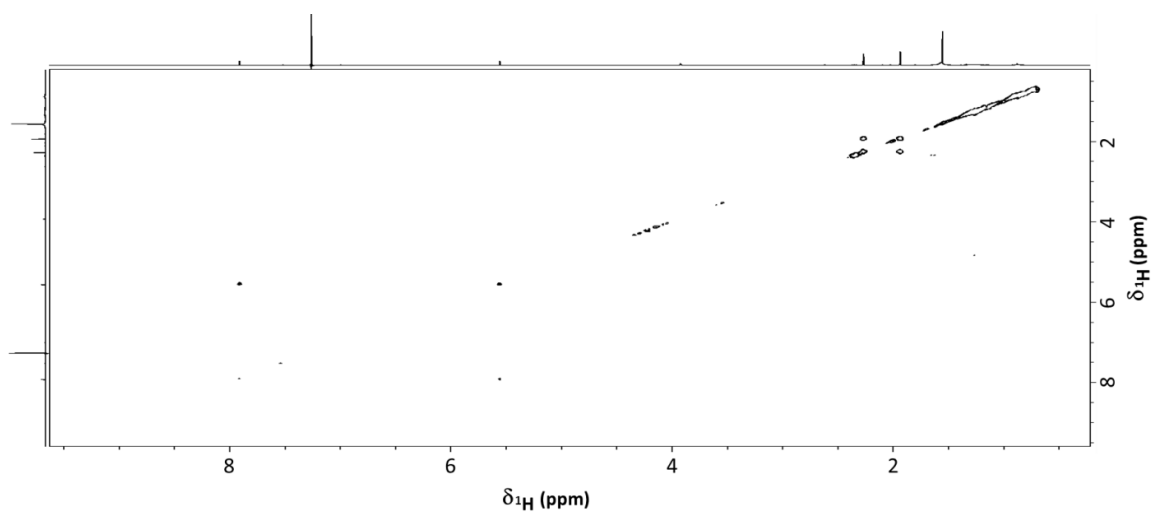

**Figure S8.**  $^1\text{H}$ - $^1\text{H}$  COSY of chlamyphilone.

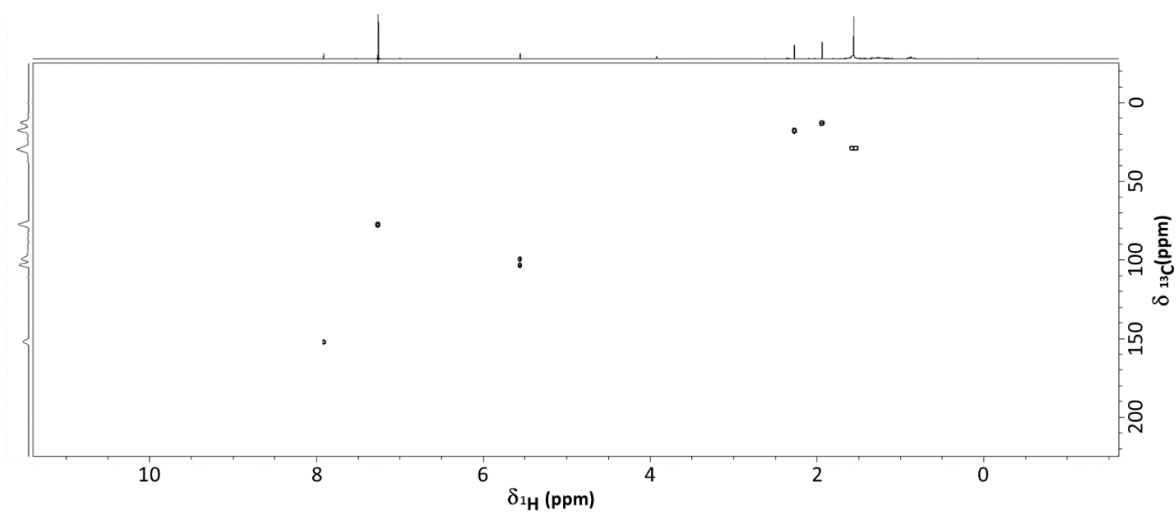

**Figure S9.**  $^1\text{H}$ - $^{13}\text{C}$  HSQC of chlamyphilone.

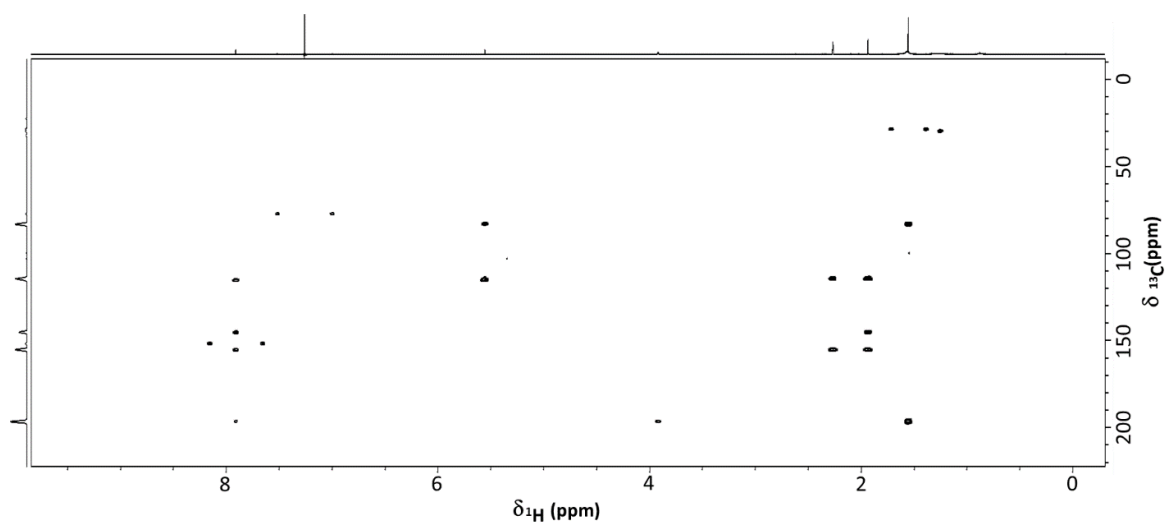

**Figure S10.**  $^1\text{H}$ - $^{13}\text{C}$  HMBC of chlamyphilone.

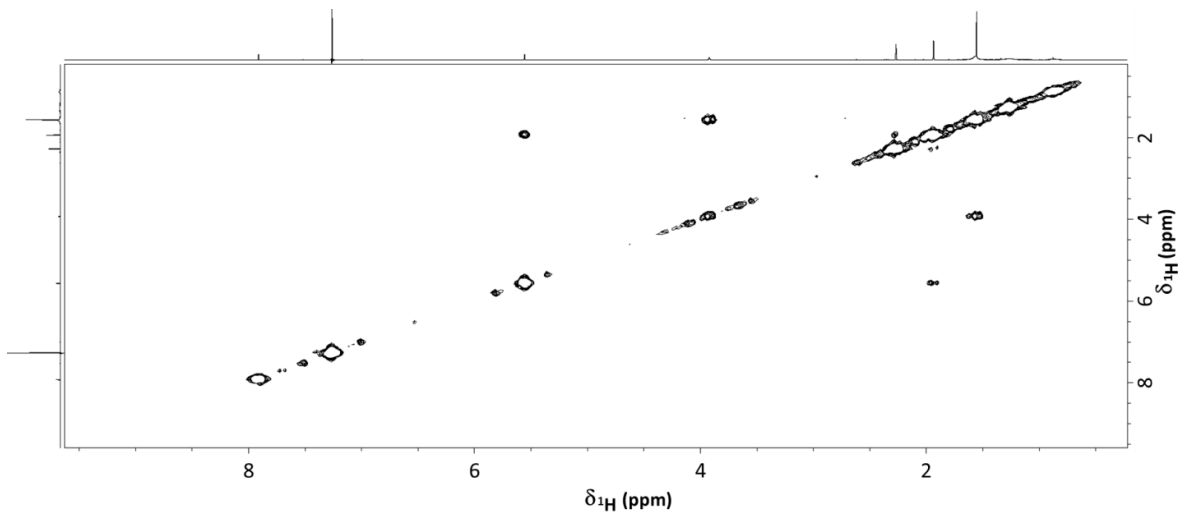

**Figure S11.**  $^1\text{H}$ - $^1\text{H}$  NOESY of chlamyphilone.

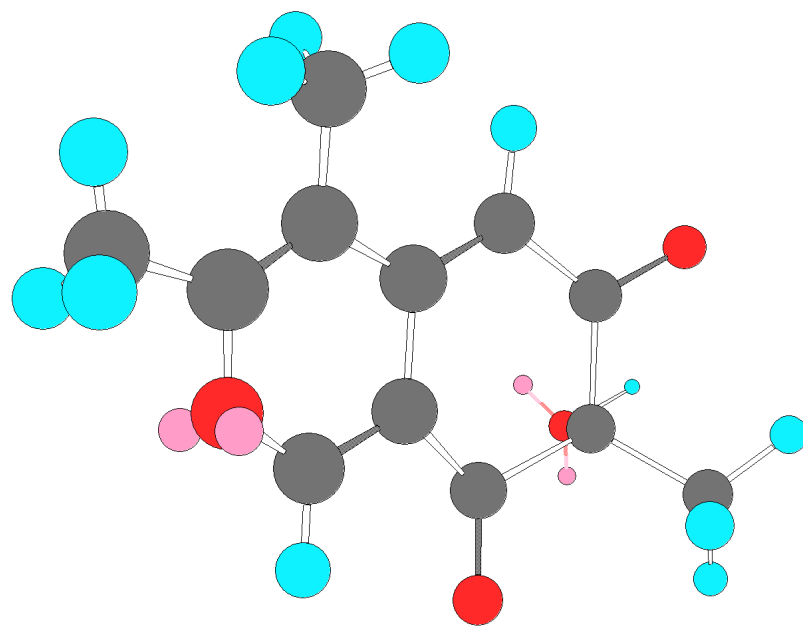

**Figure S12.** Conformational model of chlamyphilone.

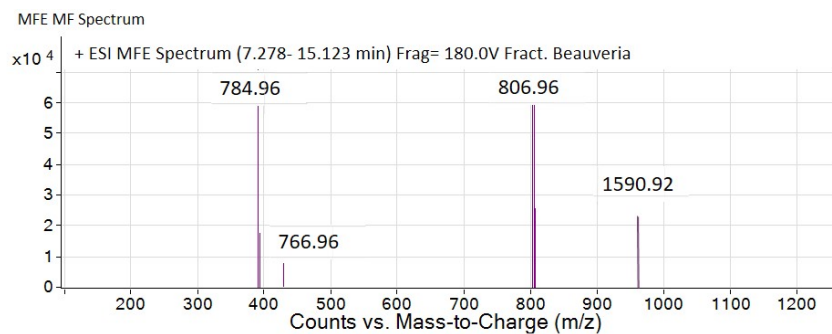

**Figure S13.** Mass spectrum of fraction 3 from *B. bassiana* corresponding to beauvericin;  $m/z$  784,96 =  $[M+H]^+$ ;  $m/z$  766,96 =  $[M+H-H_2O]^+$ ;  $m/z$  806,96 =  $[M+Na]^+$ ;  $m/z$  1590,92 =  $[M_2+Na]^+$ .

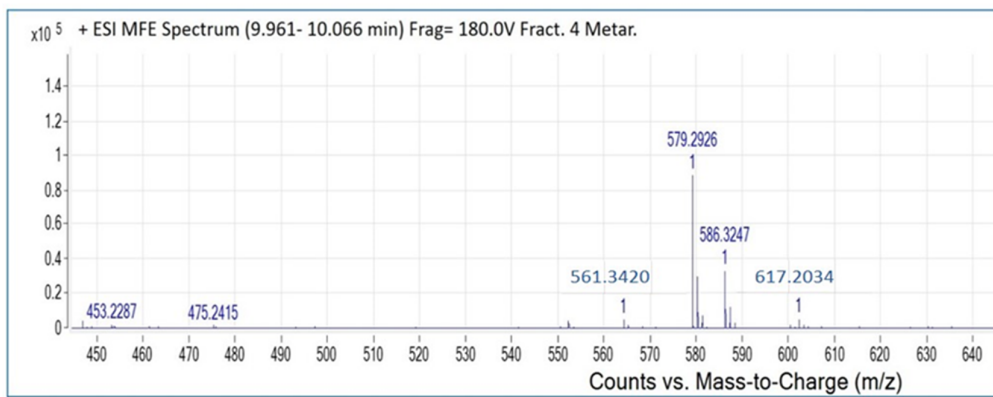

**Figure S14.** Mass spectrum of Destruxin B2;  $m/z$  579,2926 =  $[M+H]^+$ ;  $m/z$  561,3420 =  $[M+H-H_2O]^+$ ;  $m/z$  617,2034 =  $[M+K]^+$ .



Table S1: Biological activity of the isolated compounds.

| Fungal species                  | Secondary metabolites | % of aphids mortality (72 h after treatment) | Biological activities reported on other organisms                                                                                                                                                                                                                     | References*                              |
|---------------------------------|-----------------------|----------------------------------------------|-----------------------------------------------------------------------------------------------------------------------------------------------------------------------------------------------------------------------------------------------------------------------|------------------------------------------|
| <i>Paecilomyces lilacinus</i>   | Leucinostatins        | 30 (0.5 mg/ml)                               | Nematicide (77% of <i>Caenorhabditis elegans</i> mortality at 100 mg/L)                                                                                                                                                                                               | Park et al., 2004                        |
| <i>Penicillium griseofulvum</i> | Griseofulvin          | 73 (0.5 mg/ml)                               | Insecticide (toxic at 250 mg/L in diets on corn earworm, <i>Helicoverpa zea</i> Boddie, and on fall armyworm, <i>Spodoptera frugiperda</i> (J. E. Smith))                                                                                                             | Dowd, 1993                               |
| <i>Beauveria bassiana</i>       | Beauvericin           | 40 (0.5 mg/ml)                               | Insecticide (toxic at different concentration on <i>Artemia salina</i> , a model organism to study insecticidal activity, <i>Calliphora erythrocephala</i> , <i>Aedes aegypti</i> , <i>Lygus spp.</i> , <i>Spodoptera frugiperda</i> and <i>Schizaphis graminum</i> ) | Wang e Xu, 2012                          |
| <i>Metarhizium anisopliae</i>   | Destruxin             | 60 (0.5 mg/ml)                               | Insecticide on different species (i.e. value for 12-day-old <i>Spodoptera litura</i> larvae in combined application assay was 0.045 µg/g body weight, of 0.17 µg/g body weight in the ingestion assay and 0.237 µg/g body weight in the topical application assay)    | Soledade et al., 2012; Sree et al., 2008 |
| <i>Talaromyces pinophilus</i>   | 3-O-Methylfunicone    | 48 (0.5 mg/ml)                               | Antibiotic (active at 0.1 mg/mL on <i>Rhizoctonia solani</i> , <i>Alternaria alternata</i> , <i>Cylindrocladium scoparium</i> and <i>Fusarium solani</i> )                                                                                                            | Nicoletti et al., 2009                   |

\*

Dowd, P. F. Toxicity of the fungal metabolite griseofulvin to *Helicoverpa zea* and *Spodoptera frugiperda*. *Entomol. Exp. Appl.* **1993**, *69*, 5-11.

Park, J. O.; Hargreaves, J. R.; McConville, E. J.; Stirling, G. R.; Ghisalberti, E. L.; Sivasithamparam, K. Production of leucinostatins and nematocidal activity of Australian isolates of *Paecilomyces lilacinus* (Thom) Samson. *Lett. Appl. Microbiol.* **2004**, *38*, 271276.

Soledade, M.; Pedras, C.; Zaharia, L. I.; Ward, D. E. The destruxins: synthesis, biosynthesis, biotransformation, and biological activity. *Phytochemistry* **2002**, *59*, 579–596.

Sree, K. S.; Padmaja, V.; Murthy, Y. L. N. Insecticidal activity of destruxin, a mycotoxin from *Metarhizium anisopliae* (Hypocreales), against *Spodoptera litura* (Lepidoptera: Noctuidae) larval stages. *Pest Manag. Sci.* **2008**, *64*, 119-125.

Wang, Q.; Xu, L. Beauvericin, a bioactive compound produced by fungi: a short review. *Molecules* **2012**, *17*, 2367-2377.

Nicoletti, R.; Manzo, E.; Ciavatta, M. L. Occurrence and bioactivities of funicone-related compounds. *Int. J. Mol. Sci.* **2009**, *10*, 1430-1444.
